# Supplementary material for: Reduced Vrk2 expression is associated with higher risk of depression in humans and mediates depressive-like behaviors in mice
Source: Springer Nature journal article supplement (doi:10.1186/s12916-023-02945-0), 2023-07-14
Supplement: MOESM1 [file 25788014]

**Table S1. Association results of the VRK2 SNPs with depression in Europeans (PGC2 [1], UK Biobank [2] and 23andMe [3]) and Han Chinese (CONVERGE [4]) GWAS.**

| CHR | POS      | SNP        | A1 | A2 | Frequency of A1 |         | PGC2+UKB |        |          | 23andMe |        |          | PGC2+UKB+23andMe meta-analysis |       |       | CONVERGE |       |       |          |
|-----|----------|------------|----|----|-----------------|---------|----------|--------|----------|---------|--------|----------|--------------------------------|-------|-------|----------|-------|-------|----------|
|     |          |            |    |    | European        | Chinese | OR       | SE     | P        | OR      | SE     | P        | P                              | OR    | Q     | I        | OR    | SE    | P        |
| 2   | 57956088 | rs13025126 | A  | G  | 0.385           | 0.411   | 1.017    | 0.0044 | 1.16E-04 | 1.027   | 0.0062 | 1.55E-05 | 1.34E-08                       | 1.021 | 0.197 | 39.82    | 1.081 | 0.028 | 6.02E-03 |
| 2   | 57987593 | rs11682175 | T  | C  | 0.528           | 0.558   | 0.981    | 0.0043 | 6.91E-06 | 0.968   | 0.0060 | 9.10E-08 | 1.10E-11                       | 0.977 | 0.083 | 66.74    | 0.935 | 0.028 | 1.57E-02 |
| 2   | 57988194 | rs11688767 | A  | T  | 0.514           | 0.540   | 0.981    | 0.0043 | 8.84E-06 | 0.969   | 0.0060 | 1.39E-07 | 1.86E-11                       | 0.977 | 0.088 | 65.68    | 0.939 | 0.028 | 2.29E-02 |
| 2   | 57995348 | rs13016665 | A  | C  | 0.429           | 0.580   | 1.016    | 0.0044 | 4.27E-04 | 1.029   | 0.0062 | 4.54E-06 | 3.32E-08                       | 1.020 | 0.090 | 65.27    | 1.077 | 0.029 | 2.04E-02 |
| 2   | 57998040 | rs11695135 | A  | C  | 0.610           | 0.582   | 0.981    | 0.0044 | 2.24E-05 | 0.972   | 0.0062 | 3.59E-06 | 7.55E-10                       | 0.978 | 0.197 | 39.82    | 0.920 | 0.028 | 2.95E-03 |
| 2   | 58012833 | rs1568452  | T  | C  | 0.381           | 0.413   | 1.022    | 0.0044 | 1.51E-06 | 1.032   | 0.0062 | 3.19E-07 | 5.65E-12                       | 1.025 | 0.180 | 44.44    | 1.087 | 0.028 | 2.93E-03 |
| 2   | 58029645 | rs2717066  | A  | C  | 0.371           | 0.414   | 1.019    | 0.0045 | 2.58E-05 | 1.030   | 0.0062 | 1.77E-06 | 5.83E-10                       | 1.023 | 0.155 | 50.6     | 1.085 | 0.028 | 3.33E-03 |
| 2   | 58041936 | rs2717046  | T  | C  | 0.378           | 0.409   | 1.020    | 0.0044 | 7.95E-06 | 1.030   | 0.0062 | 1.43E-06 | 1.11E-10                       | 1.023 | 0.188 | 42.2     | 1.092 | 0.028 | 1.70E-03 |
| 2   | 58065936 | rs2717079  | A  | T  | 0.390           | 0.453   | 1.019    | 0.0044 | 1.96E-05 | 1.028   | 0.0061 | 9.39E-06 | 1.11E-09                       | 1.022 | 0.270 | 17.88    | 1.082 | 0.028 | 4.73E-03 |
| 2   | 58095252 | rs2717067  | C  | G  | 0.393           | 0.430   | 1.019    | 0.0044 | 2.79E-05 | 1.028   | 0.0061 | 9.11E-06 | 1.66E-09                       | 1.022 | 0.242 | 26.95    | 1.089 | 0.028 | 2.20E-03 |
| 2   | 58111064 | rs6720288  | A  | G  | 0.617           | 0.573   | 0.981    | 0.0044 | 9.99E-06 | 0.973   | 0.0062 | 6.56E-06 | 4.73E-10                       | 0.978 | 0.281 | 14.04    | 0.920 | 0.028 | 2.68E-03 |
| 2   | 58111922 | rs1533725  | T  | G  | 0.617           | 0.577   | 0.981    | 0.0044 | 1.01E-05 | 0.973   | 0.0062 | 7.65E-06 | 6.00E-10                       | 0.978 | 0.287 | 11.9     | 0.917 | 0.028 | 2.06E-03 |
| 2   | 58115072 | rs2678911  | C  | G  | 0.383           | 0.458   | 1.020    | 0.0044 | 1.02E-05 | 1.028   | 0.0062 | 8.36E-06 | 6.75E-10                       | 1.022 | 0.299 | 7.39     | 1.081 | 0.028 | 4.18E-03 |
| 2   | 58116640 | rs2683632  | T  | C  | 0.615           | 0.540   | 0.981    | 0.0044 | 1.65E-05 | 0.973   | 0.0062 | 8.19E-06 | 1.14E-09                       | 0.978 | 0.264 | 20       | 0.929 | 0.028 | 5.93E-03 |
| 2   | 58117095 | rs2678913  | T  | C  | 0.615           | 0.542   | 0.981    | 0.0044 | 2.03E-05 | 0.973   | 0.0062 | 8.21E-06 | 1.44E-09                       | 0.979 | 0.253 | 23.64    | 0.928 | 0.028 | 5.64E-03 |
| 2   | 58117926 | rs2678914  | C  | G  | 0.615           | 0.542   | 0.981    | 0.0044 | 1.91E-05 | 0.973   | 0.0062 | 8.04E-06 | 1.28E-09                       | 0.979 | 0.258 | 21.85    | 0.928 | 0.028 | 5.64E-03 |
| 2   | 58119122 | rs2717060  | A  | G  | 0.617           | 0.542   | 0.982    | 0.0044 | 4.46E-05 | 0.973   | 0.0062 | 8.36E-06 | 3.37E-09                       | 0.979 | 0.221 | 33.17    | 0.928 | 0.028 | 5.59E-03 |
| 2   | 58119582 | rs2678916  | T  | G  | 0.384           | 0.456   | 1.019    | 0.0044 | 1.64E-05 | 1.028   | 0.0062 | 9.80E-06 | 1.21E-09                       | 1.022 | 0.287 | 11.9     | 1.076 | 0.028 | 7.32E-03 |
| 2   | 58119657 | rs2717059  | C  | G  | 0.618           | 0.544   | 0.982    | 0.0044 | 6.21E-05 | 0.973   | 0.0062 | 8.29E-06 | 5.28E-09                       | 0.979 | 0.202 | 38.57    | 0.929 | 0.028 | 7.31E-03 |
| 2   | 58120553 | rs2678917  | A  | T  | 0.385           | 0.456   | 1.019    | 0.0044 | 1.94E-05 | 1.028   | 0.0062 | 8.61E-06 | 1.36E-09                       | 1.022 | 0.264 | 20       | 1.076 | 0.028 | 7.32E-03 |
| 2   | 58121391 | rs2678918  | T  | C  | 0.384           | 0.456   | 1.019    | 0.0044 | 1.82E-05 | 1.028   | 0.0062 | 9.15E-06 | 1.28E-09                       | 1.022 | 0.275 | 16.1     | 1.075 | 0.028 | 7.59E-03 |
| 2   | 58127907 | rs2717057  | T  | C  | 0.382           | 0.456   | 1.019    | 0.0044 | 1.50E-05 | 1.029   | 0.0062 | 4.92E-06 | 5.98E-10                       | 1.023 | 0.237 | 28.64    | 1.079 | 0.028 | 4.99E-03 |
| 2   | 58133522 | rs2678907  | A  | G  | 0.618           | 0.542   | 0.981    | 0.0044 | 1.83E-05 | 0.972   | 0.0062 | 4.64E-06 | 7.56E-10                       | 0.978 | 0.226 | 31.71    | 0.927 | 0.028 | 4.70E-03 |
| 2   | 58135023 | rs867740   | T  | C  | 0.617           | 0.544   | 0.981    | 0.0044 | 1.36E-05 | 0.972   | 0.0062 | 4.88E-06 | 5.01E-10                       | 0.978 | 0.237 | 28.64    | 0.932 | 0.028 | 9.00E-03 |
| 2   | 58136220 | rs2717000  | C  | G  | 0.617           | 0.540   | 0.981    | 0.0044 | 1.36E-05 | 0.972   | 0.0062 | 5.05E-06 | 5.64E-10                       | 0.978 | 0.247 | 25.36    | 0.933 | 0.028 | 9.91E-03 |
| 2   | 58138581 | rs2678902  | A  | G  | 0.383           | 0.460   | 1.019    | 0.0044 | 1.92E-05 | 1.028   | 0.0062 | 5.90E-06 | 1.01E-09                       | 1.022 | 0.237 | 28.64    | 1.071 | 0.028 | 1.06E-02 |
| 2   | 58139906 | rs2678895  | A  | T  | 0.618           | 0.544   | 0.981    | 0.0044 | 1.22E-05 | 0.973   | 0.0062 | 6.61E-06 | 5.99E-10                       | 0.978 | 0.269 | 18.08    | 0.930 | 0.028 | 7.12E-03 |
| 2   | 58144542 | rs951965   | A  | C  | 0.383           | 0.456   | 1.020    | 0.0044 | 1.14E-05 | 1.028   | 0.0062 | 6.00E-06 | 5.65E-10                       | 1.023 | 0.264 | 20       | 1.074 | 0.028 | 7.61E-03 |
| 2   | 58145060 | rs2717005  | A  | G  | 0.619           | 0.540   | 0.981    | 0.0044 | 1.30E-05 | 0.973   | 0.0062 | 7.03E-06 | 7.15E-10                       | 0.978 | 0.269 | 18.08    | 0.934 | 0.028 | 1.08E-02 |
| 2   | 58148349 | rs2465805  | T  | C  | 0.382           | 0.460   | 1.019    | 0.0044 | 1.31E-05 | 1.028   | 0.0062 | 5.73E-06 | 5.99E-10                       | 1.023 | 0.253 | 23.64    | 1.071 | 0.028 | 1.03E-02 |
| 2   | 58149158 | rs2717008  | T  | C  | 0.618           | 0.540   | 0.981    | 0.0044 | 1.17E-05 | 0.972   | 0.0062 | 5.81E-06 | 5.32E-10                       | 0.978 | 0.258 | 21.85    | 0.934 | 0.028 | 1.06E-02 |
| 2   | 58152280 | rs2717012  | A  | C  | 0.382           | 0.460   | 1.019    | 0.0044 | 1.49E-05 | 1.028   | 0.0062 | 8.76E-06 | 9.58E-10                       | 1.022 | 0.281 | 14.04    | 1.070 | 0.028 | 1.14E-02 |
| 2   | 58152537 | rs2717013  | A  | G  | 0.382           | 0.460   | 1.019    | 0.0044 | 1.59E-05 | 1.028   | 0.0062 | 6.21E-06 | 8.03E-10                       | 1.022 | 0.247 | 25.36    | 1.070 | 0.028 | 1.17E-02 |
| 2   | 58154915 | rs2678874  | A  | T  | 0.378           | 0.462   | 1.020    | 0.0044 | 7.69E-06 | 1.028   | 0.0062 | 6.07E-06 | 3.31E-10                       | 1.023 | 0.281 | 14.04    | 1.069 | 0.028 | 1.26E-02 |
| 2   | 58155829 | rs2312143  | A  | G  | 0.378           | 0.463   | 1.020    | 0.0044 | 9.18E-06 | 1.028   | 0.0062 | 6.32E-06 | 3.96E-10                       | 1.023 | 0.281 | 14.04    | 1.069 | 0.028 | 1.31E-02 |
| 2   | 58159852 | rs2717020  | T  | C  | 0.622           | 0.540   | 0.980    | 0.0044 | 7.75E-06 | 0.972   | 0.0062 | 6.05E-06 | 3.31E-10                       | 0.978 | 0.281 | 14.04    | 0.936 | 0.028 | 1.32E-02 |
| 2   | 58160138 | rs2678885  | T  | G  | 0.622           | 0.535   | 0.981    | 0.0044 | 1.01E-05 | 0.973   | 0.0062 | 7.11E-06 | 4.73E-10                       | 0.978 | 0.281 | 14.04    | 0.932 | 0.028 | 8.49E-03 |
| 2   | 58160605 | rs2717021  | A  | G  | 0.378           | 0.456   | 1.020    | 0.0044 | 9.84E-06 | 1.028   | 0.0062 | 6.00E-06 | 4.20E-10                       | 1.023 | 0.269 | 18.08    | 1.073 | 0.028 | 8.72E-03 |
| 2   | 58163146 | rs2717025  | T  | G  | 0.378           | 0.463   | 1.020    | 0.0044 | 8.53E-06 | 1.028   | 0.0062 | 6.13E-06 | 3.52E-10                       | 1.023 | 0.287 | 11.9     | 1.073 | 0.028 | 8.31E-03 |
| 2   | 58163178 | rs2717026  | A  | G  | 0.623           | 0.537   | 0.980    | 0.0044 | 8.52E-06 | 0.972   | 0.0062 | 6.09E-06 | 3.52E-10                       | 0.978 | 0.287 | 11.9     | 0.932 | 0.028 | 8.31E-03 |

|   |          |            |   |   |       |       |       |        |          |       |        |          |          |       |       |       |       |       |          |
|---|----------|------------|---|---|-------|-------|-------|--------|----------|-------|--------|----------|----------|-------|-------|-------|-------|-------|----------|
| 2 | 58165595 | rs2717029  | T | G | 0.378 | 0.465 | 1.020 | 0.0044 | 9.41E-06 | 1.028 | 0.0062 | 7.53E-06 | 4.46E-10 | 1.023 | 0.293 | 9.69  | 1.076 | 0.028 | 5.98E-03 |
| 2 | 58165694 | rs2717030  | T | C | 0.622 | 0.542 | 0.981 | 0.0044 | 9.47E-06 | 0.972 | 0.0062 | 6.15E-06 | 4.20E-10 | 0.978 | 0.269 | 18.08 | 0.929 | 0.028 | 5.76E-03 |
| 2 | 58168831 | rs2717038  | A | G | 0.623 | 0.538 | 0.980 | 0.0044 | 4.34E-06 | 0.972 | 0.0062 | 6.22E-06 | 1.61E-10 | 0.977 | 0.318 | 0     | 0.929 | 0.028 | 5.80E-03 |
| 2 | 58169166 | rs2717039  | T | G | 0.377 | 0.460 | 1.021 | 0.0044 | 3.59E-06 | 1.028 | 0.0062 | 8.59E-06 | 1.61E-10 | 1.023 | 0.357 | 0     | 1.076 | 0.028 | 5.83E-03 |
| 2 | 58171964 | rs2678898  | T | C | 0.620 | 0.537 | 0.981 | 0.0045 | 1.44E-05 | 0.973 | 0.0062 | 7.86E-06 | 1.09E-09 | 0.978 | 0.273 | 16.82 | 0.931 | 0.028 | 7.96E-03 |
| 2 | 58237405 | rs4672228  | T | C | 0.612 | 0.502 | 0.982 | 0.0044 | 4.55E-05 | 0.974 | 0.0062 | 2.15E-05 | 6.62E-09 | 0.979 | 0.287 | 11.9  | 0.942 | 0.028 | 2.61E-02 |
| 2 | 58253423 | rs13033536 | A | G | 0.373 | 0.503 | 1.019 | 0.0045 | 2.50E-05 | 1.026 | 0.0062 | 4.91E-05 | 8.00E-09 | 1.021 | 0.404 | 0     | 1.060 | 0.028 | 3.42E-02 |

### Abbreviation

CHR, chromosome; POS, position; SNP, single nucleotide polymorphism; A1, allele 1; A2, allele 2; OR, odds ratio; SE, standard error.

**Table S2. Overview of the differentially phosphorylated proteins between *Vrk2*<sup>-/-</sup> and *Vrk2*<sup>+/+</sup> mice.**

| Gene Name | Mol weight [kDa] | Sequence length | Position | AA | Sequence window                  | Vrk2 <sup>-/-</sup> Intensity |            |            | Vrk2 <sup>+/+</sup> Intensity |           |           | GroupB/ GroupA | P value |
|-----------|------------------|-----------------|----------|----|----------------------------------|-------------------------------|------------|------------|-------------------------------|-----------|-----------|----------------|---------|
|           |                  |                 |          |    |                                  | GroupB-4                      | GroupB-5   | GroupB-6   | GroupA-1                      | GroupA-2  | GroupA-3  |                |         |
| Ubr4      | 572.3            | 5180            | 226      | S  | ISPQALVEGENDEQSSPDQVSAAKTKSVFIA  | 245123.6                      |            | 321869.2   |                               | 35769.0   | 44943.4   | 7.02           | 0.024   |
| Mical3    | 223.7            | 1993            | 1452     | T  | TLGQSQFNSTSDSTMLTPPSSPPPPPPNEEP  | 1897069.2                     | 2149835.3  | 3375999.8  | 434864.9                      |           | 343224.7  | 6.36           | 0.039   |
| Mical3    | 223.7            | 1993            | 1456     | S  | QSFNTSDSTMLTPPSSPPPPPPNEEPATLR   | 1897069.2                     | 2149835.3  | 3375999.8  | 434864.9                      |           | 343224.7  | 6.36           | 0.039   |
| Psm2      | 100.2            | 908             | 20       | T  | GRDKTPVQSQQPSATTSPSGADEKSSGKERRD | 582612.0                      |            | 366467.8   | 186195.3                      | 35688.2   | 38519.2   | 5.47           | 0.033   |
| Smim13    | 10.0             | 88              | 70       | S  | NEQPSGSETEEDPSASQKIRARQRRPPVD    | 344611.8                      | 384056.0   | 607126.4   | 59893.9                       | 108826.4  |           | 5.28           | 0.043   |
| Cdk14     | 53.0             | 469             | 134      | S  | SSPSSTSPKFGKADSYEKLEKLGESYATV    | 1650301.3                     | 1224611.6  | 1502772.7  |                               | 512840.6  | 46691.9   | 5.22           | 0.016   |
| Smim13    | 10.0             | 88              | 63       | T  | TGSQEGDNEQPSGSETEEDPSASQKIRAR    | 2014821.6                     | 5607686.4  | 4571735.6  | 1331622.7                     | 359781.5  | 649708.8  | 5.21           | 0.041   |
| H1-4      | 22.0             | 219             | 2        | S  | _____MSETAAPAAPAPAEK             | 1804220.9                     | 3021450.7  | 3334752.2  | 336845.3                      | 737596.1  |           | 5.06           | 0.039   |
| Prnt2     | 35.9             | 346             | 208      | S  | LQAGDGEEGPAPQPHSPSTKTPPANGAPPR   | 2888253.9                     | 3225053.8  | 3940701.9  | 1612988.9                     | 367630.2  | 279290.2  | 4.45           | 0.0081  |
| Cys1      | 15.5             | 145             | 116      | S  | KGNPEDSCASEAPGNSPKRPEQSAISYDYS   | 206978.4                      | 233562.6   | 300297.0   | 17080.0                       |           | 118930.6  | 3.63           | 0.042   |
| Jph1      | 71.9             | 660             | 461      | T  | PPSPKESPHFYRKGTTPRSPESPQKSHSP    | 344123.5                      | 322684.3   |            | 79754.3                       | 100679.7  | 110676.7  | 3.44           | 0.00047 |
| Alad      | 36.0             | 330             | 215      | S  | FASCFYGFPRDAAQSSPAFGDRRCYQLPPGA  | 414454.5                      |            | 312369.1   | 120107.1                      | 167918.4  | 31777.6   | 3.41           | 0.028   |
| Fgd1      | 106.4            | 960             | 98       | S  | PQHHRALRFSYHLEGSQPRPLGHQGNRILVK  | 11061955.4                    | 13628403.7 | 10805647.1 | 653681.2                      | 5306820.9 | 4578582.8 | 3.37           | 0.0081  |
| Fgd1      | 106.4            | 960             | 92       | S  | LPCGSPQHHRALRFSYHLEGSQPRPLGHQG   | 11061955.4                    | 13628403.7 | 10805647.1 | 653681.2                      | 3024990.1 | 7088324.9 | 3.30           | 0.017   |
| Basp1     | 22.1             | 226             | 192      | S  | APSSKETPAASEAPSSAAKAPAAAPAAEP    | 844441.9                      | 905234.7   | 1092598.0  | 98933.3                       | 108039.3  | 665401.8  | 3.26           | 0.031   |
| Zbtb20    | 81.0             | 741             | 432      | S  | AESSAQNPQLEPAGSSPERSNESEMDNTVIT  | 1128340.8                     | 1770693.3  | 1354292.1  | 279178.6                      | 294124.0  | 746435.4  | 3.22           | 0.016   |
| Uso1      | 107.0            | 959             | 940      | S  | SKLKDGHVPEEEDESGDQEDDDDEIDGDGK   | 828678.6                      | 1518852.4  | 1999312.9  | 250717.4                      | 567449.2  | 541630.1  | 3.20           | 0.048   |
| Pclo      | 550.8            | 5068            | 3506     | S  | GGSLGCQTETDPDQTSPPYMGATSPPKDKKR  | 2814740.2                     | 3414376.8  | 3709463.4  | 2107181.1                     | 666644.7  | 444630.1  | 3.09           | 0.019   |
| Oxr1      | 95.9             | 866             | 346      | S  | TEESLSEDAFTESELSPIRELLSSEPRQEK   | 3214179.3                     | 1817840.1  | 2622364.6  | 431046.3                      | 846347.2  | 1236693.9 | 3.04           | 0.021   |
| Sgip1     | 86.1             | 806             | 335      | T  | PEHVTPELTPREQVVTPPAASDIPADSPAPA  | 5026362.1                     | 6409429.8  | 8240542.2  | 1611336.9                     | 2657304.3 | 2570795.9 | 2.88           | 0.012   |
| Slc38a3   | 55.6             | 505             | 53       | S  | TQHCGEGKGLQKSPKPEHFTDFEGKTSFG    | 172958.2                      | 269147.8   |            | 82968.3                       | 94915.6   | 56064.8   | 2.83           | 0.035   |
| Lsm14a    | 50.5             | 462             | 183      | S  | QDTRSVPKQLAQGRSSQLDPLRKSPTMEQA   |                               | 1219922.7  | 1189962.5  | 480459.4                      | 402490.1  | 394896.5  | 2.83           | 0.00023 |
| Clip4     | 75.8             | 704             | 580      | S  | SNKQNH5YPGFRRSFSTTSASSQKINRRNA   | 152114.6                      | 126908.2   | 106525.8   | 60767.0                       | 46449.3   | 32530.3   | 2.76           | 0.0061  |
| Map1a     | 300.1            | 2776            | 895      | S  | EATQGLDYVPSAGTISPTSSLEEDKGFKSP   | 14802999.2                    | 13587497.7 | 19453709.0 | 4397554.1                     | 5489777.0 | 8101646.5 | 2.66           | 0.0090  |
| Cd34      | 41.0             | 382             | 343      | S  | TENGGGQGYSSGPGASPETQGGKANVTRGAQE | 142186.1                      | 147633.6   |            |                               | 65850.9   | 43419.4   | 2.65           | 0.016   |
| Hsph1     | 96.4             | 858             | 558      | S  | PQVQTDGQQTSSQSPPELTSSESKTPDADK   | 3158099.3                     | 4209161.7  | 4023592.3  | 1980523.0                     | 1242459.7 | 1185503.7 | 2.58           | 0.0049  |
| Arhgap35  | 170.4            | 1499            | 975      | S  | ACSTTEEVFNPRAGSPLCNSNLQDSEEDVE   | 1789377.0                     | 1743053.5  | 2548831.9  | 987802.3                      | 495382.4  | 931398.5  | 2.52           | 0.016   |
| Syngap1   | 148.2            | 1340            | 892      | S  | LTAALGLRPAPAGRLSQSGSSITAAAGMRLS  | 695075.4                      | 620605.8   | 1018452.2  | 327547.5                      | 417261.8  | 199844.3  | 2.47           | 0.028   |
| Wdr44     | 101.6            | 915             | 27       | S  | DAPEDVHLGTGYPVGGSPGKVGLLSFKEAENT | 852692.3                      | 636207.0   | 619934.1   |                               | 285712.9  | 294617.2  | 2.42           | 0.024   |
| Cntn20a1  | 74.2             | 681             | 269      | S  | VCPMRKRIEREVKSSPESPLMEKKSNLKE    | 1500363.2                     | 1462555.2  | 1596742.2  | 659112.6                      | 598235.9  |           | 2.42           | 0.00055 |
| Nckip5d   | 78.6             | 714             | 260      | S  | HTTVSQPQSPSKAPSPPEPTTEVAETNST    | 4997677.8                     | 4677095.4  | 5386550.5  | 1175585.3                     | 3147538.8 | 2261738.3 | 2.29           | 0.0096  |
| Ttyh3     | 57.7             | 524             | 437      | S  | DGEEETAPGPRQAHDSLRYHMPSLYSCGSS   | 162441.8                      | 187179.3   | 219747.0   | 71433.3                       | 91581.6   | 88088.6   | 2.27           | 0.0039  |
| Rmdn3     | 52.0             | 470             | 212      | S  | EDEVSCETVRMGRKDSLDDVEAASSPAAAA   | 229016.5                      | 262403.2   |            | 91185.4                       | 104192.4  | 134893.7  | 2.23           | 0.0074  |
| Camkv     | 54.8             | 512             | 436      | S  | ITPATDGSVTPATDRSATPATDGRATPATEE  | 988391.6                      | 919456.6   | 1385483.3  | 338784.7                      | 796762.9  | 360103.6  | 2.20           | 0.045   |
| Ank2      | 426.3            | 3898            | 2206     | S  | EESYKHEGLAETPETSPELSFSPKKEEQI    | 232664.5                      | 269324.2   |            | 110820.1                      | 94274.0   | 145354.6  | 2.15           | 0.011   |
| Jph3      | 81.2             | 744             | 420      | S  | AQEEARIARITAKEFSPSQFHRENGLEYQRP  | 1343248.2                     | 1588710.6  | 2067568.5  | 683329.1                      | 911273.1  | 790288.9  | 2.10           | 0.017   |
| Rtn3      | 103.9            | 964             | 31       | S  | SSSGAEPALGGGGSPGACPALGAKSCGSS    | 13114235.0                    | 15490494.0 | 18949774.3 | 11552339.3                    | 3577244.7 | 8176381.2 | 2.04           | 0.048   |
| Numb1     | 64.1             | 604             | 263      | S  | AAPAVAPGPAQPGHVSPTPATTSPEKGEAG   |                               | 2114145.5  | 2371076.0  | 1191822.7                     | 711214.9  | 1394736.6 | 2.04           | 0.026   |
| Sos1      | 150.9            | 1319            | 1120     | S  | FDSHSA5PFHRSASVSSISLSKGTDEVPV    | 50181.8                       | 53106.7    |            | 29433.6                       | 21276.2   |           | 2.04           | 0.026   |
| Cntnap2   | 148.2            | 1332            | 1304     | S  | RHKGYHTNEAKGAESAESAADAAMNNDPNF   | 904017.3                      | 1028639.7  | 884657.6   | 286081.0                      | 628078.2  | 486043.1  | 2.01           | 0.012   |
| Cntnap2   | 148.2            | 1332            | 1307     | S  | GTYHTNEAKGAESAESAADAAMNNDPNFTET  | 1183936.6                     | 1340598.5  | 1231618.4  | 424899.3                      | 824494.5  | 618678.3  | 2.01           | 0.0072  |
| Rtn4      | 126.6            | 1162            | 953      | S  | VKPKVLTKEAEELKPSDTEKEDRSLTAVLSA  | 4171989.3                     | 2696642.2  | 3148040.6  | 1085250.9                     | 1760471.1 | 2145914.7 | 2.01           | 0.035   |
| Ppp1r7    | 41.3             | 361             | 12       | S  | _____MAAERGAGQQSQEMMEVDRRVESEES  | 73112.1                       | 66487.1    | 43578.7    | 102469.3                      | 129740.6  | 135753.6  | 0.50           | 0.011   |
| Tagln3    | 22.5             | 199             | 163      | S  | PSWFHRKAQQNRRGFSEEQLRQQQNVIGLQM  | 212729.6                      | 260794.9   | 100513.2   | 328307.7                      | 427544.7  | 400820.5  | 0.50           | 0.026   |
| Snx2      | 58.5             | 519             | 185      | S  | LSMFSKSEFVSKRRFDFLGLHSLKASKYLH   | 33669.9                       | 31624.6    | 17529.5    | 45172.1                       | 61525.8   | 63272.6   | 0.49           | 0.019   |

|          |       |      |      |   |                                  |           |           |           |            |            |            |      |         |
|----------|-------|------|------|---|----------------------------------|-----------|-----------|-----------|------------|------------|------------|------|---------|
| Psd3     | 114.7 | 1037 | 719  | S | EGGDFSKDLLKALYNSIKNEKLEWAVDDEEK  | 18991.1   |           | 37005.3   | 59205.5    | 57044.8    | 56422.6    | 0.49 | 0.022   |
| Nostrin  | 57.7  | 506  | 479  | S | IVTVHEKKEEGWVFGSLKGRGHFPAAYVEE   |           | 34678.5   | 51540.1   |            | 91961.4    | 85657.6    | 0.49 | 0.037   |
| Pkp4     | 131.6 | 1190 | 280  | S | LPAQRAASPYQRPASPTAVRRVGSVTSRQT   | 146512.4  | 632400.2  | 538352.4  | 829705.6   | 874223.8   | 1011746.0  | 0.49 | 0.042   |
| Shank1   | 226.3 | 2167 | 615  | S | VGWFPSCDLEEVANRSQEGRQESRDKAKRL   | 480547.2  | 610964.8  | 409141.4  | 787380.3   | 1292477.2  | 1022519.6  | 0.48 | 0.027   |
| Slc4a3   | 135.4 | 1227 | 175  | S | PPQKAKFSIGSDEDDSPGLPVKAPCAKALPS  | 123574.5  | 63573.3   | 59167.2   |            | 173444.4   | 166389.7   | 0.48 | 0.047   |
| Ctnna1   | 81.5  | 731  | 373  | S | QLLSVWMQTQSRKTKSAEEELTVLKISHS    | 24708.7   | 22760.7   |           | 37578.4    | 52394.9    | 57707.5    | 0.48 | 0.047   |
| Pgm2     | 68.7  | 620  | 173  | S | TVSHLKLKAGIMITASHNPKQDNGYKVVYWDN | 88016.1   | 88006.0   | 71551.7   | 186478.2   | 141691.0   | 193165.1   | 0.47 | 0.0059  |
| Nsfl1c   | 40.7  | 370  | 176  | S | PEEESAYVAGERRRHSGQDVHVVLKWKTF    | 873427.6  | 984514.7  | 1599931.0 | 2613289.8  | 2202723.7  | 2479200.8  | 0.47 | 0.0075  |
| Sgip1    | 86.1  | 806  | 528  | S | LSAATPTVGSRRGSPSPLTMGAQDLPVAAA   | 29021.8   |           | 18074.2   | 50891.4    |            | 49553.2    | 0.47 | 0.040   |
| Sgip1    | 86.1  | 806  | 484  | S | LPPGKPGVGDVSRPFPPIHSSPPPIAPLA    |           | 894917.3  | 1031806.5 | 2289761.3  | 1862126.3  |            | 0.46 | 0.038   |
| Pip4p1   | 30.0  | 284  | 169  | S | CKRIINLGPVHPGPLSPPEQPMGVRVICGHC  | 175280.7  | 233417.3  | 99924.9   | 399433.1   | 254502.5   | 451932.0   | 0.46 | 0.048   |
| Nrbp2    | 57.3  | 499  | 207  | S | VVYRIFSNALPDDLRSPIRAEREELRNLHFF  | 150739.0  | 62212.1   | 196438.2  | 321485.1   | 284013.0   | 288937.8   | 0.46 | 0.017   |
| Nsfl1c   | 40.7  | 370  | 140  | S | GAKEHGAVAVERVTKSPGETSKPRPFAGGGY  | 52740.3   | 24655.3   |           | 91600.6    | 85653.3    | 76888.5    | 0.46 | 0.030   |
| Kcnab1   | 44.7  | 401  | 60   | S | IIARSLGFTTPQHHSIKESTAKQTMKMYRN   | 35074.0   | 46221.5   | 9100.5    | 61232.4    | 62730.9    | 76977.5    | 0.45 | 0.038   |
| Cldn11   | 22.1  | 207  | 198  | S | QSFGENRFYSSGSSSPTHAKSAHV         | 5954299.3 | 6895677.2 | 8602328.4 | 12374248.9 | 17050066.5 | 18672669.8 | 0.45 | 0.012   |
| Syn1     | 74.1  | 706  | 427  | S | NKMTQALPRQPQRDASPRGRGSHSQSSSPGAL | 1138603.1 | 703095.6  | 590521.2  | 1770978.9  | 1649494.6  | 2064983.5  | 0.44 | 0.0080  |
| Ampd2    | 92.0  | 798  | 53   | S | MDGKCKEIAEELFSRSLAESELSAPYEFPE   | 23915.8   | 29044.8   | 20177.9   | 44554.8    | 67047.0    |            | 0.44 | 0.040   |
| Brsk2    | 81.7  | 735  | 424  | S | QRSRSISGASSGLSTSPSSPRVTPHPSPRG   | 916512.1  | 829929.0  | 738549.6  | 1716278.2  | 2355112.2  | 1702148.6  | 0.43 | 0.0078  |
| Syt3     | 63.3  | 587  | 382  | S | FSVPLAELAQRKHLHFSVYDFDRFSRHDLIGQ | 173047.9  | 99134.9   | 42841.7   | 242399.3   | 202545.9   | 293544.1   | 0.43 | 0.037   |
| Mbp      | 27.2  | 250  | 206  | S | DSHTRTHYGLSPKQSHGRTRQDENPVVHFF   | 86754.0   | 127560.6  | 53377.1   | 162454.1   | 273193.9   | 198032.8   | 0.42 | 0.035   |
| Rbm12    | 102.8 | 992  | 424  | S | PRSKSPSGKRSRSPHAGFCVYLKGLPF      | 72412.2   | 70752.5   | 103225.4  | 186888.0   | 207697.0   | 200562.8   | 0.41 | 0.00068 |
| Nefl     | 61.5  | 543  | 13   | S | MSSFGYDYPFSTSYKRRYVETPRVHISS     | 20764.4   | 31176.9   | 12030.0   |            | 48591.5    | 56177.0    | 0.41 | 0.027   |
| Map1a    | 300.1 | 2776 | 1797 | T | PSAPGQESPVPDTKSTPPTRNEPTPSWLAE   | 2892636.8 | 1890548.6 | 2029504.8 | 4759884.9  | 6055727.2  | 6150966.6  | 0.40 | 0.0035  |
| Kcnj3    | 56.6  | 501  | 385  | S | PLIAPAITSKERNHNSVECLDGLDDISTKLP  | 34738.9   | 52832.9   | 58960.7   | 108798.4   | 133350.5   | 124119.9   | 0.40 | 0.0020  |
| Map1b    | 270.3 | 2464 | 1775 | S | SLASEKVQSLGEKLSPKSDISPLTPRESSP   | 719329.3  | 849612.5  | 255646.3  | 1346592.6  | 1957697.2  | 1270247.4  | 0.40 | 0.032   |
| Grin2b   | 166.0 | 1482 | 930  | S | NGSPQASLDFIRRESSVYDISEHRRSFTHSD  | 111053.4  | 174429.9  | 251608.8  | 448180.8   | 588379.7   | 318024.1   | 0.40 | 0.036   |
| Phyhipl  | 42.3  | 375  | 12   | S | MEVPRLDHALSSPSPCEEIKNLSLEA       | 308333.7  | 187283.0  | 281176.9  | 684010.4   | 779128.3   | 521706.0   | 0.39 | 0.0086  |
| Git1     | 85.3  | 770  | 419  | S | EPLPSAGATRNRRARSMDSSDLSDGAVTLQE  | 158474.4  | 64470.4   | 94883.4   | 228911.6   |            | 325627.6   | 0.38 | 0.043   |
| Mical3   | 223.7 | 1993 | 1406 | S | KSAGDQPPLLTPKSPDKELRSSQEERRDLS   | 26995.4   | 59668.7   |           | 118066.2   |            | 118424.9   | 0.37 | 0.044   |
| Mical3   | 223.7 | 1993 | 1404 | S | LPKSAGDQPPLLTPKSPDKELRSSQEERRD   | 26995.4   | 59668.7   |           | 118066.2   |            | 118424.9   | 0.37 | 0.044   |
| Nipbl    | 315.5 | 2798 | 2666 | S | GSPKNNTAADTEDEESDGEDRGGGTSGLRR   |           | 54239.0   | 37652.6   | 126375.8   | 124694.5   |            | 0.37 | 0.011   |
| Relch    | 134.6 | 1216 | 56   | S | LGAGVGLDPGSAGSLSPQDPMALGSSARPG   | 243548.8  | 164864.3  | 160686.1  |            | 546635.6   | 530629.7   | 0.35 | 0.0022  |
| Scn2a    | 227.9 | 2006 | 488  | S | DFSGAGGIGVFSESSSVASKLSSKSEKELKN  | 80585.6   | 52010.6   | 143058.6  |            | 278441.4   | 244093.8   | 0.35 | 0.020   |
| Hnrnpm   | 77.6  | 729  | 452  | S | GLVMDRMGVSVERMGSSIERMGLPLGDHMASS | 38537.2   |           | 15540.4   | 74684.1    | 84180.0    | 73869.3    | 0.35 | 0.013   |
| Phyhipl  | 42.3  | 375  | 11   | S | MEVPRLDHALSSPSPCEEIKNLSLE        | 308333.7  | 187283.0  | 192510.1  | 684010.4   | 779128.3   | 521706.0   | 0.35 | 0.0070  |
| Ak5      | 63.3  | 562  | 181  | S | LLRKKIHSASSNRKWSLIAKIITNGELAPQE  | 11449.8   |           | 9807.1    | 28060.0    | 33399.3    |            | 0.35 | 0.019   |
| Rims1    | 163.2 | 1463 | 1448 | S | SSLVDPTLPLTRRASQSSLESSSGPPCIRS   | 108700.7  | 577385.9  |           | 1091474.6  | 914079.2   | 1048769.9  | 0.34 | 0.037   |
| Rab3c    | 25.9  | 227  | 211  | S | SESLETDPAITAAKQSTRLKETPPPPQPNCG  |           | 24271.8   | 19814.8   | 65913.4    |            | 66408.7    | 0.33 | 0.0026  |
| Syn1     | 74.1  | 706  | 438  | S | QRDASPRGRGSHSQSSSPGALTGRQTSQPPA  | 2015020.8 | 467526.5  | 581879.6  | 4020810.1  | 3543062.8  | 2262549.7  | 0.31 | 0.036   |
| Itpr2    | 307.5 | 2701 | 937  | S | HGVGEMMTQMVLRSRGSIFPVSPDAQPIVHP  | 90452.7   | 16823.3   | 55776.5   | 158208.7   | 160769.6   | 205764.7   | 0.31 | 0.010   |
| C2cd5    | 111.7 | 1016 | 659  | S | PIPEPRQRSRLRSQSESSDEVTELDLSHGK   | 30863.7   | 24627.5   |           |            | 100404.2   | 91267.1    | 0.29 | 0.0065  |
| Tmem63b  | 94.8  | 832  | 114  | S | HGDSDHRYERLTSVSSSVDFDQRDNGFCSWL  | 26126.8   | 41402.8   | 20591.9   | 97248.2    |            | 119992.8   | 0.27 | 0.0065  |
| Ptds1    | 55.6  | 473  | 442  | S | EISWHHGKSGKSEDSPPKHSHHSHSSRR     | 32593.9   | 36182.0   |           |            | 139714.1   | 115076.7   | 0.27 | 0.017   |
| Ncam1    | 119.4 | 1115 | 788  | T | ESKEPIVEVTEERTPNHDGGKHTEPNETT    | 1445268.8 | 216252.4  |           | 3617220.8  | 3428369.0  | 2512572.3  | 0.26 | 0.034   |
| Pclo     | 550.8 | 5068 | 1563 | S | RKSSTSFDDDAGRHRSHWHDEDETFDESP    | 166528.7  | 168688.3  | 32631.9   | 443573.4   | 778470.8   | 332320.1   | 0.24 | 0.049   |
| Dbn1     | 77.3  | 706  | 387  | S | SHRRMAPTPIPTRSPSDSSTASTPIAEQIER  |           | 360926.6  | 378977.9  | 1524847.9  | 1704395.8  |            | 0.23 | 0.0052  |
| Rims1    | 163.2 | 1463 | 1110 | S | IHKDQYRSCDNASAKSSDSVSDVSAISRAS   |           | 54826.8   | 38622.0   | 232432.4   | 186766.9   |            | 0.22 | 0.021   |
| Fip1l1   | 65.0  | 581  | 479  | S | RERERTRERERERDHSPTPSVFNSSDEERYR  | 40743.9   | 52801.9   | 45797.7   | 273709.1   | 253559.0   | 170346.1   | 0.20 | 0.0043  |
| Clec2l   | 23.7  | 211  | 29   | S | PPPAARPAAPRPRSPAEAEARGPEGLLRR    | 42608.6   | 138683.7  |           | 378231.7   | 411084.1   | 584103.7   | 0.20 | 0.027   |
| Cdkn2aip | 59.7  | 563  | 169  | S | KSAKTRDSAAQRQENSSPSRGSSTKSESGGTS |           | 63750.0   | 13676.0   | 176135.5   | 168537.9   | 242636.3   | 0.20 | 0.022   |

|          |       |      |     |   |                                 |         |         |        |          |           |           |      |        |
|----------|-------|------|-----|---|---------------------------------|---------|---------|--------|----------|-----------|-----------|------|--------|
| Dlg2     | 94.9  | 852  | 574 | S | GLSFKYGDILHVINASDDEWWQARRVTLGDG |         | 4139.4  | 2644.1 | 15236.4  |           | 19462.1   | 0.20 | 0.025  |
| Slc9a3r1 | 38.6  | 355  | 294 | S | ALARSASDSTSEELNSQDSPKRQVSTEPST  | 29261.2 | 83065.7 |        | 337790.7 | 423822.5  | 368366.2  | 0.15 | 0.0035 |
| Slc4a4   | 121.5 | 1079 | 68  | S | EKKEKERISENYSKSDVENADESSSILKP   | 85626.4 | 57308.6 |        |          | 1196166.8 | 1452625.5 | 0.05 | 0.010  |

## References

1. Wray NR, Ripke S, Mattheisen M, Trzaskowski M, Byrne EM, Abdellaoui A, Adams MJ, Agerbo E, Air TM, Andlauer TMF *et al*: **Genome-wide association analyses identify 44 risk variants and refine the genetic architecture of major depression.** *Nat Genet* 2018, **50**(5):668-681.
2. Howard DM, Adams MJ, Shirali M, Clarke TK, Marioni RE, Davies G, Coleman JRI, Alloza C, Shen X, Barbu MC *et al*: **Genome-wide association study of depression phenotypes in UK Biobank identifies variants in excitatory synaptic pathways.** *Nat Commun* 2018, **9**(1):1470.
3. Hyde CL, Nagle MW, Tian C, Chen X, Paciga SA, Wendland JR, Tung JY, Hinds DA, Perlis RH, Winslow AR: **Identification of 15 genetic loci associated with risk of major depression in individuals of European descent.** *Nat Genet* 2016, **48**(9):1031-1036.
4. Converge consortium: **Sparse whole-genome sequencing identifies two loci for major depressive disorder.** *Nature* 2015, **523**(7562):588-591.
