# Supplementary material for: Reduced Vrk2 expression is associated with higher risk of depression in humans and mediates depressive-like behaviors in mice
Source: Springer Nature journal article supplement (doi:10.1186/s12916-023-02945-0), 2023-07-14
Supplement: MOESM2 [file 25788014]

Figure S1. Flow chart of the genetic analyses.



Figure S2. The linkage disequilibrium (LD) maps of the VRK2 SNPs in European and Han Chinese individuals from 1000 Genomes Project [1]. The figure was generated using the Haploview software [2], and the LD of the tested SNPs was calculated using  $r^2$  algorithm implemented in the Haploview program.



Figure S3. Functional prediction of the 47 SNPs using HaploReg v.4.2 [3].

| variant    | Ref | Alt | AFR freq | AMR freq | ASN freq | EUR freq | SiPhy cons | Promoter histone marks | Enhancer histone marks | DNase      | Proteins bound   | Motifs changed         |
|------------|-----|-----|----------|----------|----------|----------|------------|------------------------|------------------------|------------|------------------|------------------------|
| rs13025126 | G   | A   | 0.03     | 0.41     | 0.41     | 0.38     |            |                        |                        | MUS        |                  | 5 altered motifs       |
| rs11682175 | T   | C   | 0.20     | 0.47     | 0.44     | 0.44     |            | 16 tissues             | 12 tissues             | 4 tissues  |                  | 8 altered motifs       |
| rs11688767 | A   | T   | 0.20     | 0.48     | 0.46     | 0.47     |            |                        | 5 tissues              |            |                  | 9 altered motifs       |
| rs13016665 | C   | A   | 0.35     | 0.50     | 0.58     | 0.44     |            |                        |                        |            |                  | 7 altered motifs       |
| rs11695135 | A   | C   | 0.03     | 0.40     | 0.42     | 0.39     |            |                        |                        |            |                  | EWSR1-FLI1,GATA,PU.1   |
| rs1568452  | C   | T   | 0.14     | 0.41     | 0.41     | 0.36     |            |                        |                        |            |                  |                        |
| rs2717066  | C   | A   | 0.04     | 0.38     | 0.41     | 0.36     |            |                        |                        | PLCNT      | YY1              | 5 altered motifs       |
| rs2717046  | C   | T   | 0.12     | 0.40     | 0.41     | 0.37     |            |                        | LNG                    |            |                  | NF-kappaB,STAT         |
| rs2717079  | T   | A   | 0.13     | 0.41     | 0.45     | 0.39     |            |                        |                        |            |                  | Arid5a,YY1             |
| rs2717067  | G   | C   | 0.05     | 0.40     | 0.43     | 0.39     |            |                        | MUS, LNG               |            |                  | Foxc1                  |
| rs6720288  | A   | G   | 0.34     | 0.42     | 0.43     | 0.38     |            |                        | FAT, LNG, BLD          |            |                  | Dobox4                 |
| rs1533725  | T   | G   | 0.14     | 0.40     | 0.42     | 0.39     |            |                        | LNG, BLD               |            |                  |                        |
| rs2678911  | G   | C   | 0.05     | 0.39     | 0.46     | 0.39     |            |                        | BLD                    |            |                  |                        |
| rs2683632  | T   | C   | 0.34     | 0.42     | 0.46     | 0.39     |            |                        |                        |            |                  | 6 altered motifs       |
| rs2678913  | T   | C   | 0.34     | 0.42     | 0.46     | 0.39     |            |                        | FAT, BRN               |            |                  | 4 altered motifs       |
| rs2678914  | C   | G   | 0.14     | 0.40     | 0.46     | 0.39     |            |                        | 8 tissues              | 8 tissues  | 4 bound proteins | Arid5b,Zbtb12          |
| rs2717060  | A   | G   | 0.25     | 0.41     | 0.46     | 0.39     |            |                        | BRN, GI, BLD           | BRN,BRN    |                  | Hdx,Homez,Pou3f1       |
| rs2678916  | G   | T   | 0.05     | 0.40     | 0.46     | 0.39     |            |                        | BRN, GI, BLD           |            |                  | EWSR1-FLI1,Ik-2,NF-AT1 |
| rs2717059  | C   | G   | 0.35     | 0.42     | 0.46     | 0.39     |            |                        | BRN, GI, BLD           |            |                  | 7 altered motifs       |
| rs2678917  | T   | A   | 0.25     | 0.41     | 0.46     | 0.39     |            | BLD                    | 5 tissues              | BRN,BLD    |                  | 4 altered motifs       |
| rs2678918  | C   | T   | 0.05     | 0.40     | 0.46     | 0.39     |            |                        | 5 tissues              | BRN,BRN    |                  | 7 altered motifs       |
| rs2717057  | C   | T   | 0.34     | 0.41     | 0.46     | 0.38     |            |                        |                        |            |                  | CDP,Hbp1,TCF11::MafG   |
| rs2678907  | A   | G   | 0.14     | 0.39     | 0.46     | 0.38     |            |                        | 4 tissues              | 42 tissues | 8 bound proteins | Mef2                   |
| rs867740   | T   | C   | 0.05     | 0.40     | 0.46     | 0.39     |            | BRN                    | FAT, BLD, LNG          |            |                  | NR4A                   |
| rs2717000  | C   | G   | 0.14     | 0.39     | 0.46     | 0.39     |            | BRN                    | BLD                    | 6 tissues  | 4 bound proteins | Irf                    |
| rs2678902  | G   | A   | 0.14     | 0.39     | 0.46     | 0.39     |            |                        | ESDR, BRN              |            |                  | Pou2f2,STAT            |
| rs2678895  | A   | T   | 0.05     | 0.39     | 0.46     | 0.38     |            |                        | FAT, BRN               |            |                  | Maf                    |
| rs951965   | C   | A   | 0.14     | 0.39     | 0.46     | 0.39     |            |                        |                        |            |                  | Ets,GATA,HDAC2         |
| rs2717005  | A   | G   | 0.06     | 0.39     | 0.46     | 0.39     |            |                        |                        |            |                  | ERalpha-a,Pbx3         |
| rs2465805  | C   | T   | 0.25     | 0.39     | 0.46     | 0.38     |            |                        | BRN                    |            |                  | 7 altered motifs       |
| rs2717008  | T   | C   | 0.14     | 0.40     | 0.46     | 0.38     |            |                        | ESDR, BRN              | BRN,BRN    |                  | HDAC2,TCF11::MafG      |
| rs2717012  | C   | A   | 0.05     | 0.38     | 0.46     | 0.39     |            |                        |                        |            |                  |                        |
| rs2717013  | G   | A   | 0.10     | 0.39     | 0.46     | 0.39     |            |                        |                        |            |                  | Arid5a,Pou2f2,Pou3f3   |
| rs2678874  | T   | A   | 0.10     | 0.39     | 0.46     | 0.38     |            |                        |                        |            |                  | 4 altered motifs       |
| rs2312143  | G   | A   | 0.10     | 0.39     | 0.46     | 0.39     |            |                        |                        |            |                  | CDP,Foxa,Pou2f2        |
| rs2717020  | T   | C   | 0.10     | 0.39     | 0.46     | 0.38     |            |                        |                        |            |                  | 4 altered motifs       |
| rs2678885  | T   | G   | 0.05     | 0.39     | 0.47     | 0.38     |            |                        |                        |            |                  | 9 altered motifs       |
| rs2717021  | G   | A   | 0.10     | 0.39     | 0.46     | 0.38     |            |                        |                        |            |                  | 5 altered motifs       |
| rs2717025  | G   | T   | 0.10     | 0.39     | 0.46     | 0.38     |            |                        |                        |            |                  | Myf,TATA,ZEB1          |
| rs2717026  | A   | G   | 0.10     | 0.39     | 0.46     | 0.38     |            |                        |                        |            |                  |                        |
| rs2717029  | G   | T   | 0.05     | 0.39     | 0.47     | 0.38     |            |                        |                        |            |                  | Irx                    |
| rs2717030  | T   | C   | 0.10     | 0.39     | 0.46     | 0.38     |            |                        |                        |            |                  | CCNT2                  |
| rs2717038  | A   | G   | 0.12     | 0.40     | 0.46     | 0.38     |            |                        | BRN                    |            |                  | 5 altered motifs       |
| rs2717039  | G   | T   | 0.05     | 0.39     | 0.46     | 0.38     |            |                        | ESC, IPSC, BRN         | ESDR       |                  | Rhox11,Zbtb3           |
| rs2678898  | T   | C   | 0.11     | 0.39     | 0.46     | 0.38     |            |                        |                        |            |                  | EWSR1-FLI1,HDAC2,VDR   |
| rs4672228  | T   | C   | 0.07     | 0.41     | 0.50     | 0.40     |            | ESDR                   | ESDR, LNG              |            |                  | CDP                    |
| rs13033536 | G   | A   | 0.08     | 0.41     | 0.50     | 0.40     |            |                        |                        |            |                  | 5 altered motifs       |

**Figure S4. Functional prediction of the 47 SNPs using GWAVA [4].**

| SNP        | CHR | Position   | Region score | TSS score | Unmatched score | TSS distance | CTCF | DNase | FAIRE |
|------------|-----|------------|--------------|-----------|-----------------|--------------|------|-------|-------|
| rs13025126 | 2   | 57,956,088 | 0.28         | 0.16      | 0.02            | -178697      | -    | -     | -     |
| rs11682175 | 2   | 57,987,593 | 0.27         | 0.39      | 0.41            | -147192      | -    | -     | 5     |
| rs11688767 | 2   | 57,988,194 | 0.33         | 0.24      | 0.2             | -146591      | -    | -     | -     |
| rs13016665 | 2   | 57,995,348 | 0.31         | 0.09      | 0               | -139437      | -    | -     | -     |
| rs11695135 | 2   | 57,998,040 | 0.32         | 0.19      | 0.01            | -136745      | -    | -     | -     |
| rs1568452  | 2   | 58,012,833 | 0.45         | 0.28      | 0.02            | -121952      | -    | -     | -     |
| rs2717066  | 2   | 58,029,645 | 0.76         | 0.71      | 0.5             | -105140      | -    | 1     | -     |
| rs2717046  | 2   | 58,041,936 | 0.38         | 0.21      | 0.04            | -92849       | -    | -     | -     |
| rs2717079  | 2   | 58,065,936 | 0.58         | 0.6       | 0.21            | -68849       | -    | -     | -     |
| rs2717067  | 2   | 58,095,252 | 0.36         | 0.17      | 0.04            | -39533       | -    | -     | -     |
| rs6720288  | 2   | 58,111,064 | 0.27         | 0.38      | 0.21            | -23721       | -    | -     | -     |
| rs1533725  | 2   | 58,111,922 | 0.45         | 0.75      | 0.42            | -22863       | -    | -     | -     |
| rs2678911  | 2   | 58,115,072 | 0.41         | 0.51      | 0.3             | -19713       | -    | -     | -     |
| rs2683632  | 2   | 58,116,640 | 0.23         | 0.19      | 0.03            | -18145       | -    | -     | -     |
| rs2678913  | 2   | 58,117,095 | 0.22         | 0.26      | 0.07            | -17690       | -    | -     | -     |
| rs2678914  | 2   | 58,117,926 | 0.44         | 0.56      | 0.27            | -16859       | -    | 5     | 3     |
| rs2717060  | 2   | 58,119,122 | 0.37         | 0.49      | 0.26            | -15663       | -    | -     | 1     |
| rs2678916  | 2   | 58,119,582 | 0.3          | 0.43      | 0.3             | -15203       | -    | -     | -     |
| rs2717059  | 2   | 58,119,657 | 0.21         | 0.5       | 0.15            | -15128       | -    | -     | -     |
| rs2678917  | 2   | 58,120,553 | 0.37         | 0.57      | 0.38            | -14232       | -    | -     | 2     |
| rs2678918  | 2   | 58,121,391 | 0.57         | 0.56      | 0.36            | -13394       | -    | -     | -     |
| rs2717057  | 2   | 58,127,907 | 0.22         | 0.28      | 0.12            | -6878        | -    | -     | -     |
| rs2678907  | 2   | 58,133,522 | 0.5          | 0.56      | 0.47            | -1263        | 57   | 104   | 15    |
| rs867740   | 2   | 58,135,023 | 0.19         | 0.25      | 0.42            | 231          | -    | 1     | 2     |
| rs2717000  | 2   | 58,136,220 | 0.33         | 0.29      | 0.36            | 1428         | -    | 1     | 2     |
| rs2678902  | 2   | 58,138,581 | 0.27         | 0.27      | 0.15            | 3789         | -    | -     | -     |
| rs2678895  | 2   | 58,139,906 | 0.19         | 0.13      | 0.14            | 5114         | -    | 2     | -     |
| rs951965   | 2   | 58,144,542 | 0.31         | 0.04      | 0.05            | 9750         | -    | -     | -     |
| rs2717005  | 2   | 58,145,060 | 0.39         | 0.11      | 0.02            | 10268        | -    | -     | -     |
| rs2465805  | 2   | 58,148,349 | 0.25         | 0.1       | 0               | 13557        | -    | -     | -     |
| rs2717008  | 2   | 58,149,158 | 0.41         | 0.23      | 0.13            | 14366        | -    | -     | 1     |
| rs2717012  | 2   | 58,152,280 | 0.29         | 0.04      | 0               | 17488        | -    | -     | -     |
| rs2717013  | 2   | 58,152,537 | 0.23         | 0.01      | 0               | 17745        | -    | -     | -     |
| rs2678874  | 2   | 58,154,915 | 0.34         | 0.03      | 0               | 20123        | -    | -     | -     |
| rs2312143  | 2   | 58,155,829 | 0.26         | 0.02      | 0               | 21037        | -    | -     | -     |
| rs2717020  | 2   | 58,159,852 | 0.3          | 0.04      | 0.02            | 25060        | -    | -     | 1     |
| rs2678885  | 2   | 58,160,138 | 0.27         | 0.02      | 0.02            | 25346        | -    | -     | -     |
| rs2717021  | 2   | 58,160,605 | 0.23         | 0.03      | 0               | 25813        | -    | -     | -     |
| rs2717025  | 2   | 58,163,146 | 0.28         | 0.09      | 0.02            | 28354        | -    | -     | -     |
| rs2717026  | 2   | 58,163,178 | 0.17         | 0.04      | 0.02            | 28386        | -    | -     | -     |
| rs2717029  | 2   | 58,165,595 | 0.21         | 0.04      | 0.02            | 30803        | -    | -     | -     |
| rs2717030  | 2   | 58,165,694 | 0.25         | 0.09      | 0.04            | 30902        | -    | -     | -     |
| rs2717038  | 2   | 58,168,831 | 0.37         | 0.37      | 0.2             | 34039        | -    | -     | -     |
| rs2717039  | 2   | 58,169,166 | 0.4          | 0.34      | 0.22            | 34374        | -    | -     | -     |
| rs2678898  | 2   | 58,171,964 | 0.25         | 0.28      | 0.05            | 37172        | -    | -     | -     |
| rs4672228  | 2   | 58,237,405 | 0.2          | 0.21      | 0.02            | -36246       | -    | -     | -     |
| rs13033536 | 2   | 58,253,423 | 0.34         | 0.29      | 0.23            | -20228       | -    | -     | -     |

**Abbreviation:**

SNP, single nucleotide polymorphism; CHR, chromosome; TSS, transcriptional start site.

Figure S5. Expression quantitative trait loci (eQTL) analyses of rs2678907 with *FANCL* mRNA in the DLPFC tissues from CommonMind Consortium dataset [5].



Figure S6. A. Knockdown efficiency of *Vrk2* in the wild-type C57BL/6J male mice injected with *Vrk2*-shRNA AAV in the ventral hippocampus. B. Knockout efficiency of *Vrk2* in *Vrk2*<sup>-/-</sup> mice. C. Overexpression efficiency of *Vrk2* in the ventral hippocampus of *Vrk2*<sup>-/-</sup> mice injected with *Vrk2* overexpressing AAV.



**Figure S7. Knockdown efficiency of Vrk2 mediated by shRNAs. A. VRK2 mRNA knockdown efficiencies were measured in NIH3T3 cells infected with AAV that contained VRK2-shRNA. *Vrk2*-sh1 ( $P = 0.0043$ ) and *Vrk2*-sh5 ( $P = 0.0035$ ) had the best knockdown efficiencies among the group.  $n = 2$  per group. B. The AAV containing VRK2-shRNA was injected into the ventral hippocampus of wild-type C57BL/6J male mice, and the knockdown efficiencies of *Vrk2* were detected by extracting the protein after stable expression of the virus. The results indicated that *Vrk2*-sh1 ( $P = 0.0468$ ) had a higher protein level knockdown efficiency.  $n = 3$  per group. One-way ANOVA for A-B. Error bars represent mean  $\pm$  standard deviation (SD).**



**Figure S8. Behavioral analyses of *Vrk2*<sup>+/+</sup> and *Vrk2*<sup>-/-</sup> mice after chronic restraint stress (CRS).** **A Open field test.** No difference was seen in the total distance ( $P = 0.566$ ) and central exploration time ( $P = 0.218$ ) between *Vrk2*<sup>+/+</sup> and *Vrk2*<sup>-/-</sup> mice. *Vrk2*<sup>+/+</sup>,  $n = 6$ ; *Vrk2*<sup>-/-</sup>,  $n = 9$ . **B Rotarod test.** *Vrk2*<sup>+/+</sup>,  $n = 6$ ; *Vrk2*<sup>-/-</sup>,  $n = 9$ .  $P = 0.648$ . **C Sucrose preference test.** *Vrk2*<sup>+/+</sup>,  $n = 6$ ; *Vrk2*<sup>-/-</sup>,  $n = 8$ .  $P = 0.832$ . **D Tail suspension test.** There was significant reduction in curling time ( $P = 0.0082$ ) in *Vrk2*<sup>-/-</sup> mice compared with *Vrk2*<sup>+/+</sup> mice, but no difference in immobility time ( $P = 0.221$ ). *Vrk2*<sup>+/+</sup>,  $n = 5$ ; *Vrk2*<sup>-/-</sup>,  $n = 8$ . \*  $P < 0.05$ , \*\*  $P < 0.01$ , \*\*\*  $P < 0.001$  (two-tailed t-test). Error bars represent mean  $\pm$  standard deviation (SD).



**Note:** Chronic restraint stress (CRS) in *Vrk2*<sup>-/-</sup> and *Vrk2*<sup>+/+</sup> mice was performed as previously reported [6]. In brief, the mice were placed in conical tubes (50 mL) for six hours per day (10:00 a.m. to 16:00 p.m.) for a total of 14 days. To allow the mice to breathe normally, the conical tubes included holes in the side walls and bottom. The mice were unable to move their bodies freely during the duration of restraint stress and were denied access to food and drink.



**Figure S9. Behavioral analyses of *Vrk2*<sup>+/+</sup>, *Vrk2*<sup>+/-</sup> and *Vrk2*<sup>-/-</sup> mice.** **A Open field test.** No significant difference was seen in the total distance (*Vrk2*<sup>+/+</sup> vs. *Vrk2*<sup>+/-</sup>, *P* = 0.133; *Vrk2*<sup>+/+</sup> vs. *Vrk2*<sup>-/-</sup>, *P* = 0.173) and central exploration time between different groups (*Vrk2*<sup>+/+</sup> vs. *Vrk2*<sup>+/-</sup>, *P* = 0.981; *Vrk2*<sup>+/+</sup> vs. *Vrk2*<sup>-/-</sup>, *P* = 0.218). *Vrk2*<sup>+/+</sup>, *n* = 6; *Vrk2*<sup>+/-</sup>, *n* = 10; *Vrk2*<sup>-/-</sup>, *n* = 9. **B Elevated plus maze.** No significant difference was found in distance ratio (*Vrk2*<sup>+/+</sup> vs. *Vrk2*<sup>+/-</sup>, *P* = 0.771; *Vrk2*<sup>+/+</sup> vs. *Vrk2*<sup>-/-</sup>, *P* = 0.666) and time ratio (*Vrk2*<sup>+/+</sup> vs. *Vrk2*<sup>+/-</sup>, *P* = 0.644; *Vrk2*<sup>+/+</sup> vs. *Vrk2*<sup>-/-</sup>, *P* = 0.987) into the open arms between different groups. *Vrk2*<sup>+/+</sup>, *n* = 6; *Vrk2*<sup>+/-</sup>, *n* = 10; *Vrk2*<sup>-/-</sup>, *n* = 9. **C Sucrose preference test.** *Vrk2*<sup>+/+</sup> vs. *Vrk2*<sup>+/-</sup>, *P* = 0.445; *Vrk2*<sup>+/+</sup> vs. *Vrk2*<sup>-/-</sup>, *P* = 0.279. *Vrk2*<sup>+/+</sup>, *n* = 6; *Vrk2*<sup>+/-</sup>, *n* = 6; *Vrk2*<sup>-/-</sup>, *n* = 9. **D Tail suspension test.** Immobility time: *Vrk2*<sup>+/+</sup> vs. *Vrk2*<sup>+/-</sup>, *P* = 0.854; *Vrk2*<sup>+/+</sup> vs. *Vrk2*<sup>-/-</sup>, *P* = 0.994. Curling time: *Vrk2*<sup>+/+</sup> vs. *Vrk2*<sup>+/-</sup>, *P* = 0.9771; *Vrk2*<sup>+/+</sup> vs. *Vrk2*<sup>-/-</sup>, *P* = 0.0927. *Vrk2*<sup>+/+</sup>, *n* = 6; *Vrk2*<sup>+/-</sup>, *n* = 10; *Vrk2*<sup>-/-</sup>, *n* = 9. #*P* < 0.1, One-way ANOVA for A-D. Error bars represent mean ± standard deviation (SD).



## References

1. Genomes Project Consortium, Auton A, Brooks LD, Durbin RM, Garrison EP, Kang HM, Korbel JO, Marchini JL, McCarthy S, McVean GA et al: **A global reference for human genetic variation.** *Nature* 2015, **526**(7571):68-74.
2. Barrett JC, Fry B, Maller J, Daly MJ: **Haploview: analysis and visualization of LD and haplotype maps.** *Bioinformatics* 2005, **21**(2):263-265.
3. Ward LD, Kellis M: **HaploReg: a resource for exploring chromatin states, conservation, and regulatory motif alterations within sets of genetically linked variants.** *Nucleic Acids Res* 2012, **40**(Database issue):D930-934.
4. Ritchie GR, Dunham I, Zeggini E, Flicek P: **Functional annotation of noncoding sequence variants.** *Nat Methods* 2014, **11**(3):294-296.
5. Fromer M, Roussos P, Sieberts SK, Johnson JS, Kavanagh DH, Perumal TM, Ruderfer DM, Oh EC, Topol A, Shah HR et al: **Gene expression elucidates functional impact of polygenic risk for schizophrenia.** *Nat Neurosci* 2016, **19**(11):1442-1453.
6. Ai H, Shi XF, Hu XP, Fang WQ, Zhang B, Lu W: **Acute stress regulates phosphorylation of N-methyl-D-aspartate receptor GluN2B at S1284 in hippocampus.** *Neuroscience* 2017, **351**:24-35.
